# Supplementary material for: Characterization of GLPG0492, a selective androgen receptor modulator, in a mouse model of hindlimb immobilization
Source: PubMed Central journal article supplement (PMC4167280; doi:10.1186/1471-2474-15-291), 2014-09-03

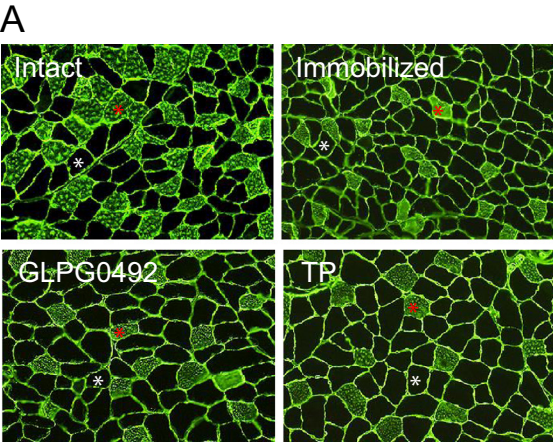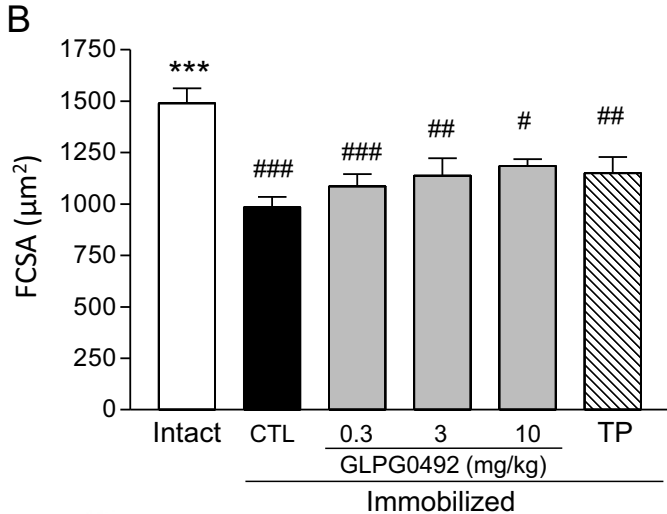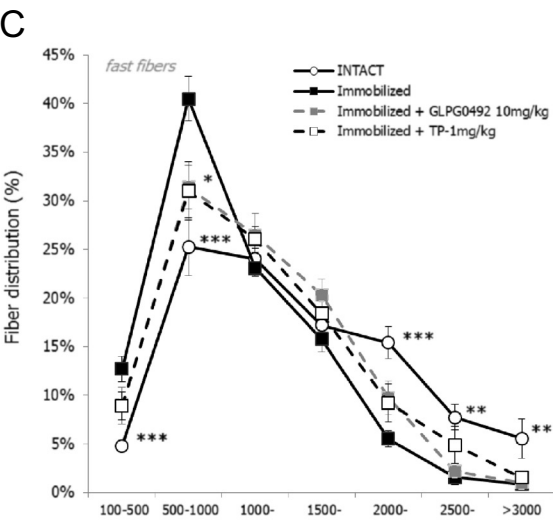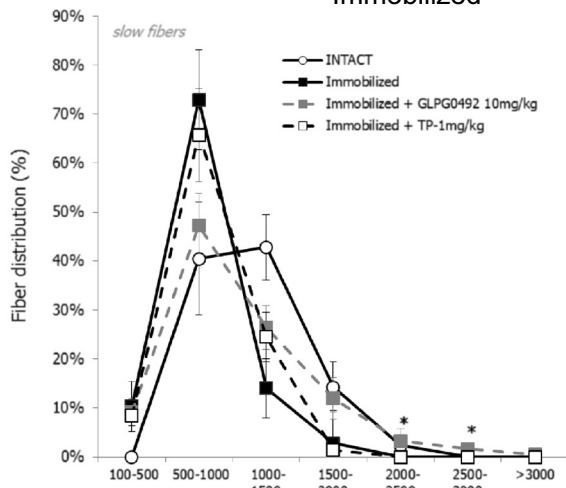

Supplement: 12891_2014_2241_MOESM2_ESM.pdf [file 12891_2014_2241_MOESM2_ESM.pdf]
